# Supplementary material for: The Transcription Factor Pdr802 Regulates Titan Cell Formation and Pathogenicity of Cryptococcus neoformans
Source: PubMed Central journal article supplement (PMC8092302; doi:10.1128/mbio.03457-20), 2021-03-09
Supplement: mBio.03457-20-sf003.pdf [file mBio.03457-20-sf003.pdf]

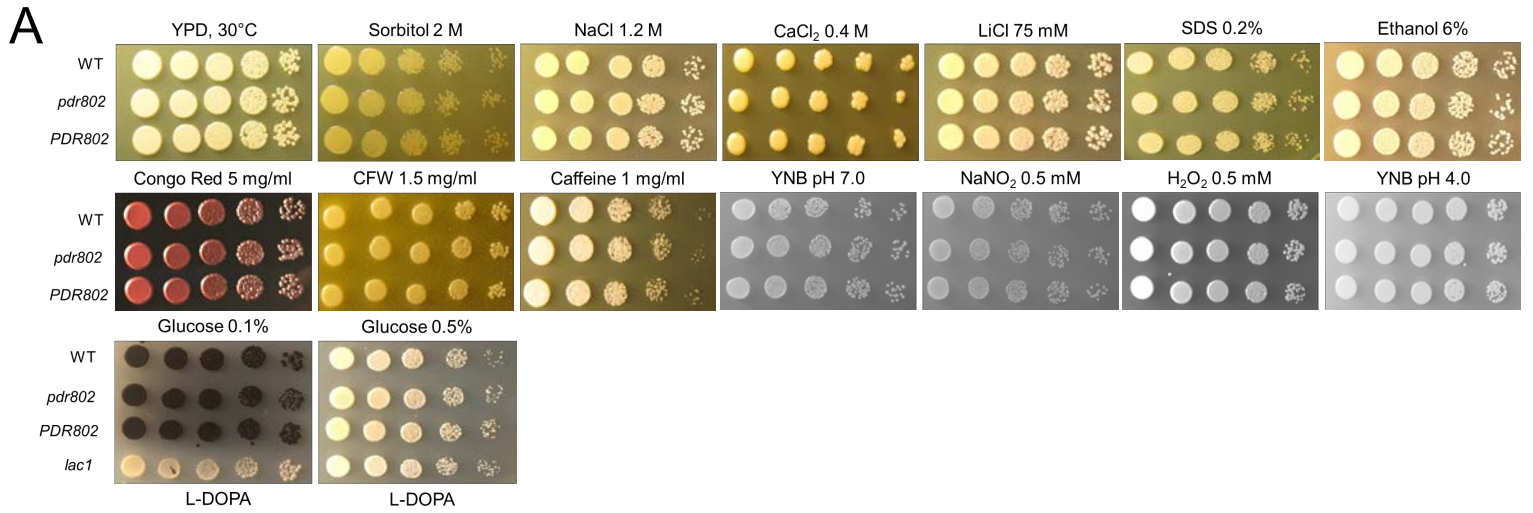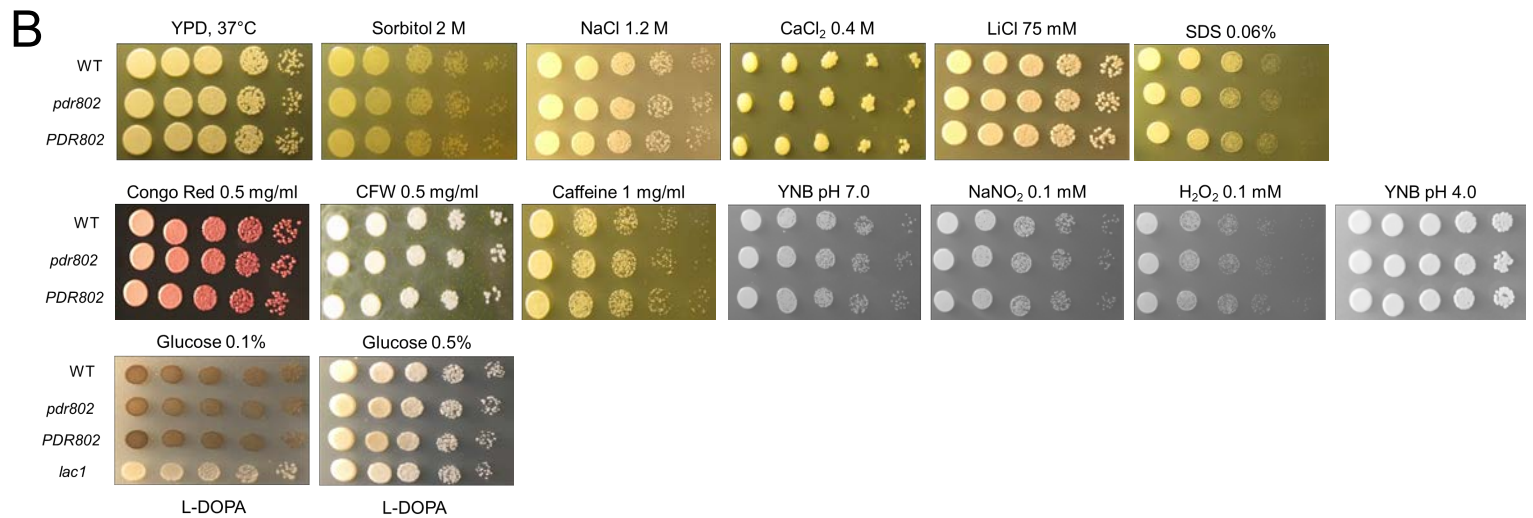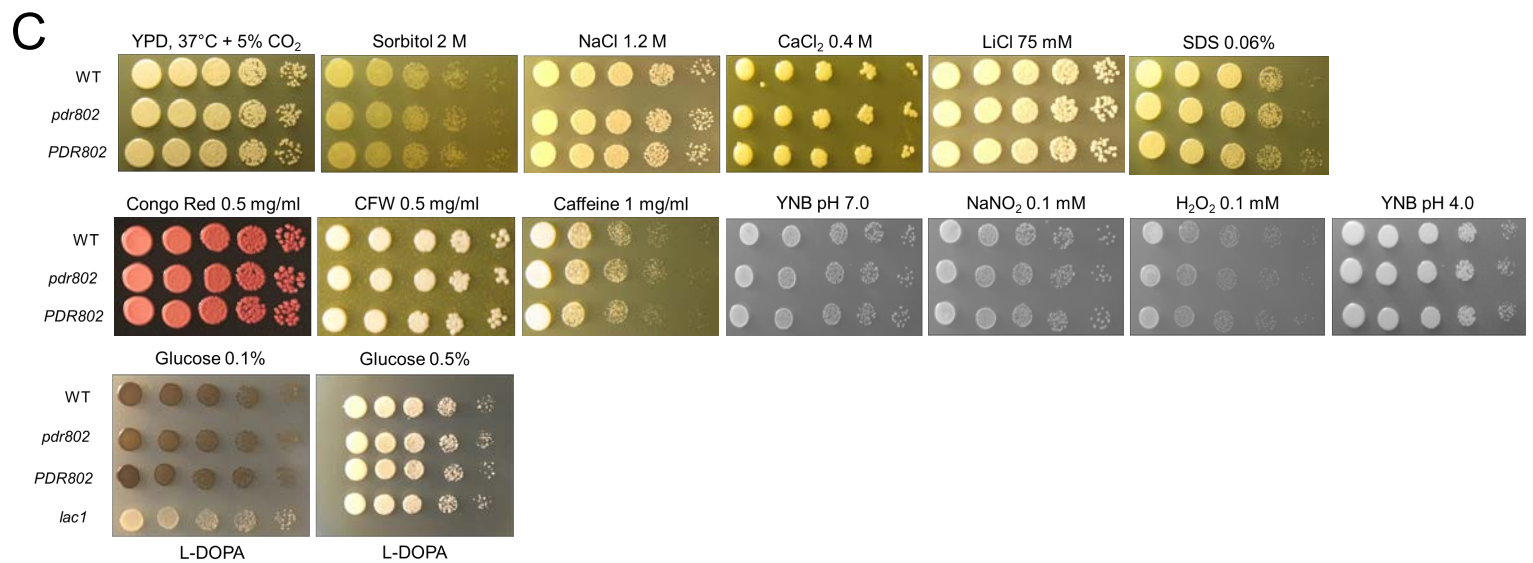

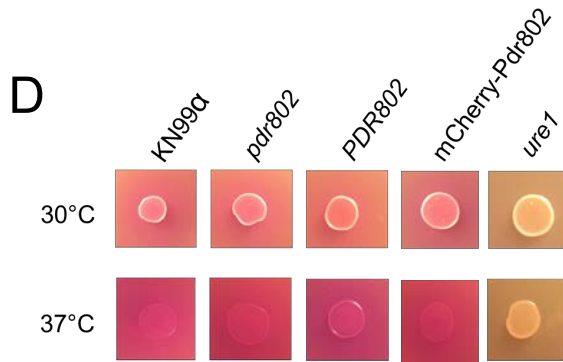

**Figure S3. Characterization of *pdr802* cells.** Panels A-C. 10-fold serial dilutions of WT, *pdr802*, and *PDR802* cells were plated on the media shown and incubated at 30°C (A), 37°C (B), or 37°C in the presence of 5% CO<sub>2</sub> (C). Nitrosative (NaNO<sub>2</sub>) and oxidative (H<sub>2</sub>O<sub>2</sub>) stress plates were prepared with YNB medium and melanization plates containing L-DOPA were prepared as in the Methods; all other plates were prepared with YPD medium. *lac1*, a control strain lacking the ability to melanize (88). D. Urease activity of the indicated strains was evaluated using Christensen's urea solid medium (see Methods) at the indicated temperatures. *ure1*, a control strain that does not produce urease (17).
