# Supplementary material for: The Transcription Factor Pdr802 Regulates Titan Cell Formation and Pathogenicity of Cryptococcus neoformans
Source: PubMed Central journal article supplement (PMC8092302; doi:10.1128/mbio.03457-20), 2021-03-09
Supplement: mBio.03457-20-sf004.pdf [file mBio.03457-20-sf004.pdf]

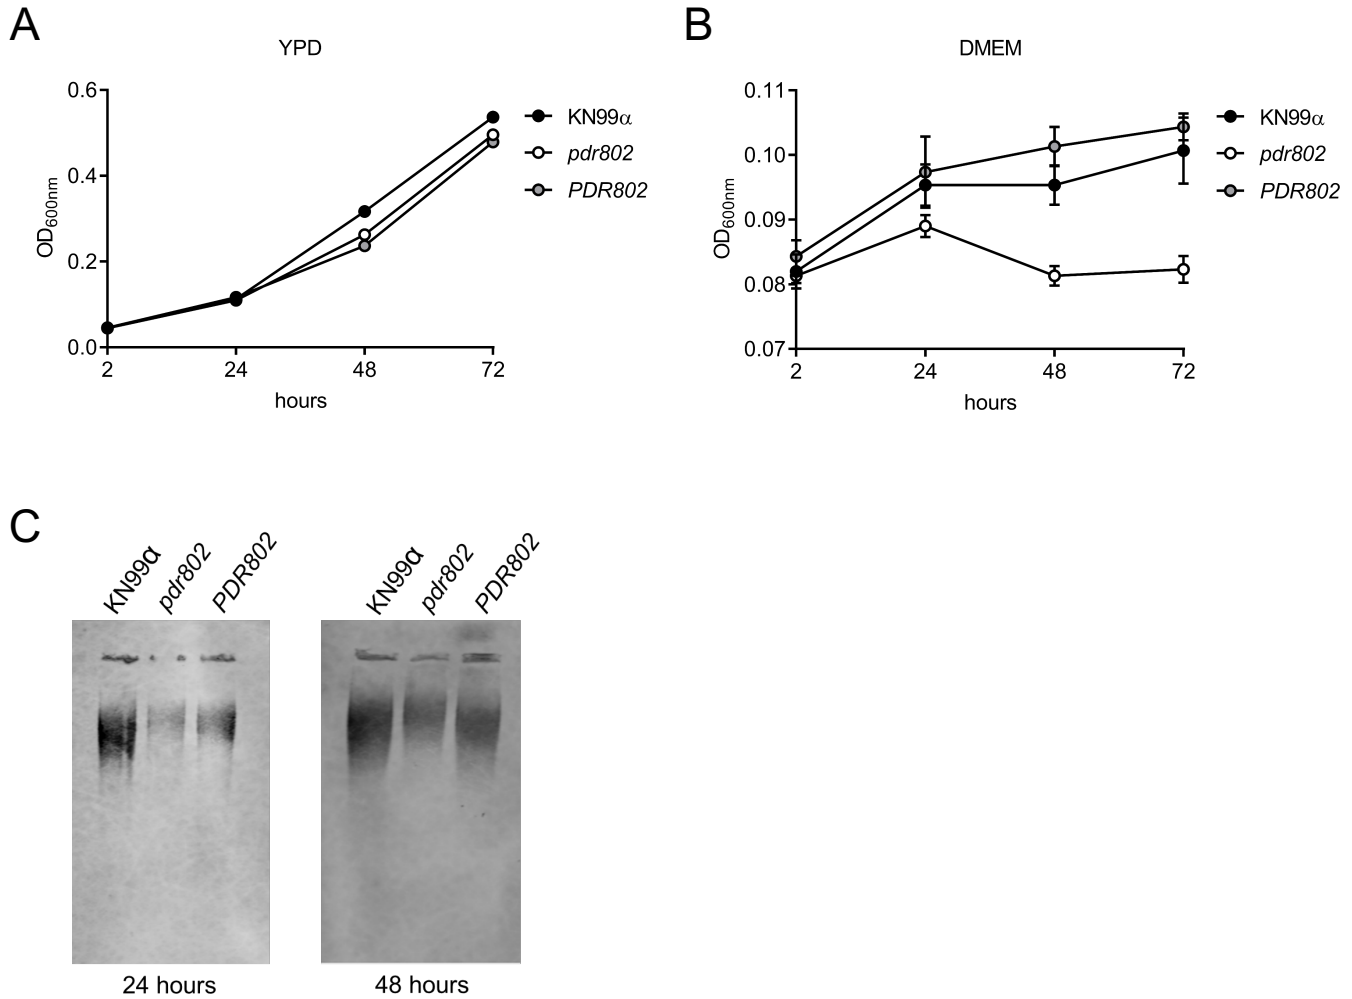

**Figure S4. Growth curves and capsule shedding.** *Panels A-B.* Growth of the indicated strains in YPD at 30°C (A) or DMEM at 37°C and 5% CO<sub>2</sub> (B) was assessed by OD<sub>600nm</sub> at the times shown. *C.* Conditioned medium from the indicated strains was probed for the presence of GXM after growth in DMEM for 24 or 48 hours. Equal volumes of culture supernatant were analyzed without normalization to cell density. Immunoblotting was performed using the anti-GXM monoclonal antibody 302.
