# Supplementary material for: The Transcription Factor Pdr802 Regulates Titan Cell Formation and Pathogenicity of Cryptococcus neoformans
Source: PubMed Central journal article supplement (PMC8092302; doi:10.1128/mbio.03457-20), 2021-03-09
Supplement: mBio.03457-20-sf006.pdf [file mBio.03457-20-sf006.pdf]

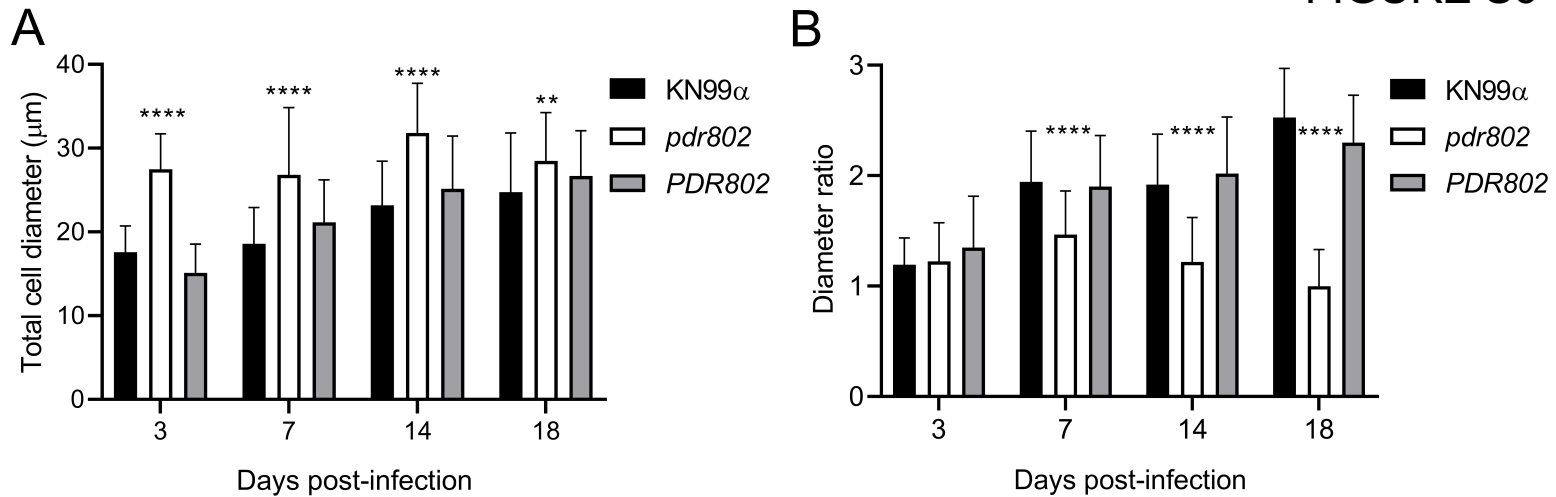

**C**

| 3 DPI                       | KN99α | <i>pdr802</i> | <i>PDR802</i> |
|-----------------------------|-------|---------------|---------------|
| Cell body diameter ≥ 10 µm  | 20    | 86.7          | 11.1          |
| Cell body diameter ≥ 15 µm  | 0     | 22.2          | 0             |
| Total cell diameter ≥ 30 µm | 0     | 31.1          | 0             |
| 7 DPI                       | KN99α | <i>pdr802</i> | <i>PDR802</i> |
| Cell body diameter ≥ 10 µm  | 8.5   | 57.4          | 8.5           |
| Cell body diameter ≥ 15 µm  | 0     | 19.1          | 2.1           |
| Total cell diameter ≥ 30 µm | 0     | 31.9          | 2.1           |
| 14 DPI                      | KN99α | <i>pdr802</i> | <i>PDR802</i> |
| Cell body diameter ≥ 10 µm  | 27.1  | 87.1          | 24.3          |
| Cell body diameter ≥ 15 µm  | 2.9   | 42.9          | 4.3           |
| Total cell diameter ≥ 30 µm | 12.9  | 57.1          | 25.7          |
| 18 DPI                      | KN99α | <i>pdr802</i> | <i>PDR802</i> |
| Cell body diameter ≥ 10 µm  | 9.1   | 89.4          | 15.1          |
| Cell body diameter ≥ 15 µm  | 0     | 53.0          | 1.5           |
| Total cell diameter ≥ 30 µm | 21.2  | 43.9          | 27.3          |

**Figure S6. *PDR802* deletion induces Titan cell formation.** Mean +/- SD of (A) total cell diameter and (B) the ratio of total cell to cell body diameters (diameter ratio), assessed by measuring at least 50 cells per strain with ImageJ. \*\*,  $p < 0.01$  and \*\*\*\*,  $p < 0.0001$  for comparison of *pdr802* to KN99α or *PDR802* by one-way ANOVA with posthoc Dunnett test for each day post-infection. C. Percent of Titan cells in the indicated strain, evaluated using various published parameters: cell body diameter above 10 or 15 µm (20) or total cell diameter above 30 µm (43).
