# Supplementary material for: The Transcription Factor Pdr802 Regulates Titan Cell Formation and Pathogenicity of Cryptococcus neoformans
Source: PubMed Central journal article supplement (PMC8092302; doi:10.1128/mbio.03457-20), 2021-03-09
Supplement: mBio.03457-20-sf007.pdf [file mBio.03457-20-sf007.pdf]

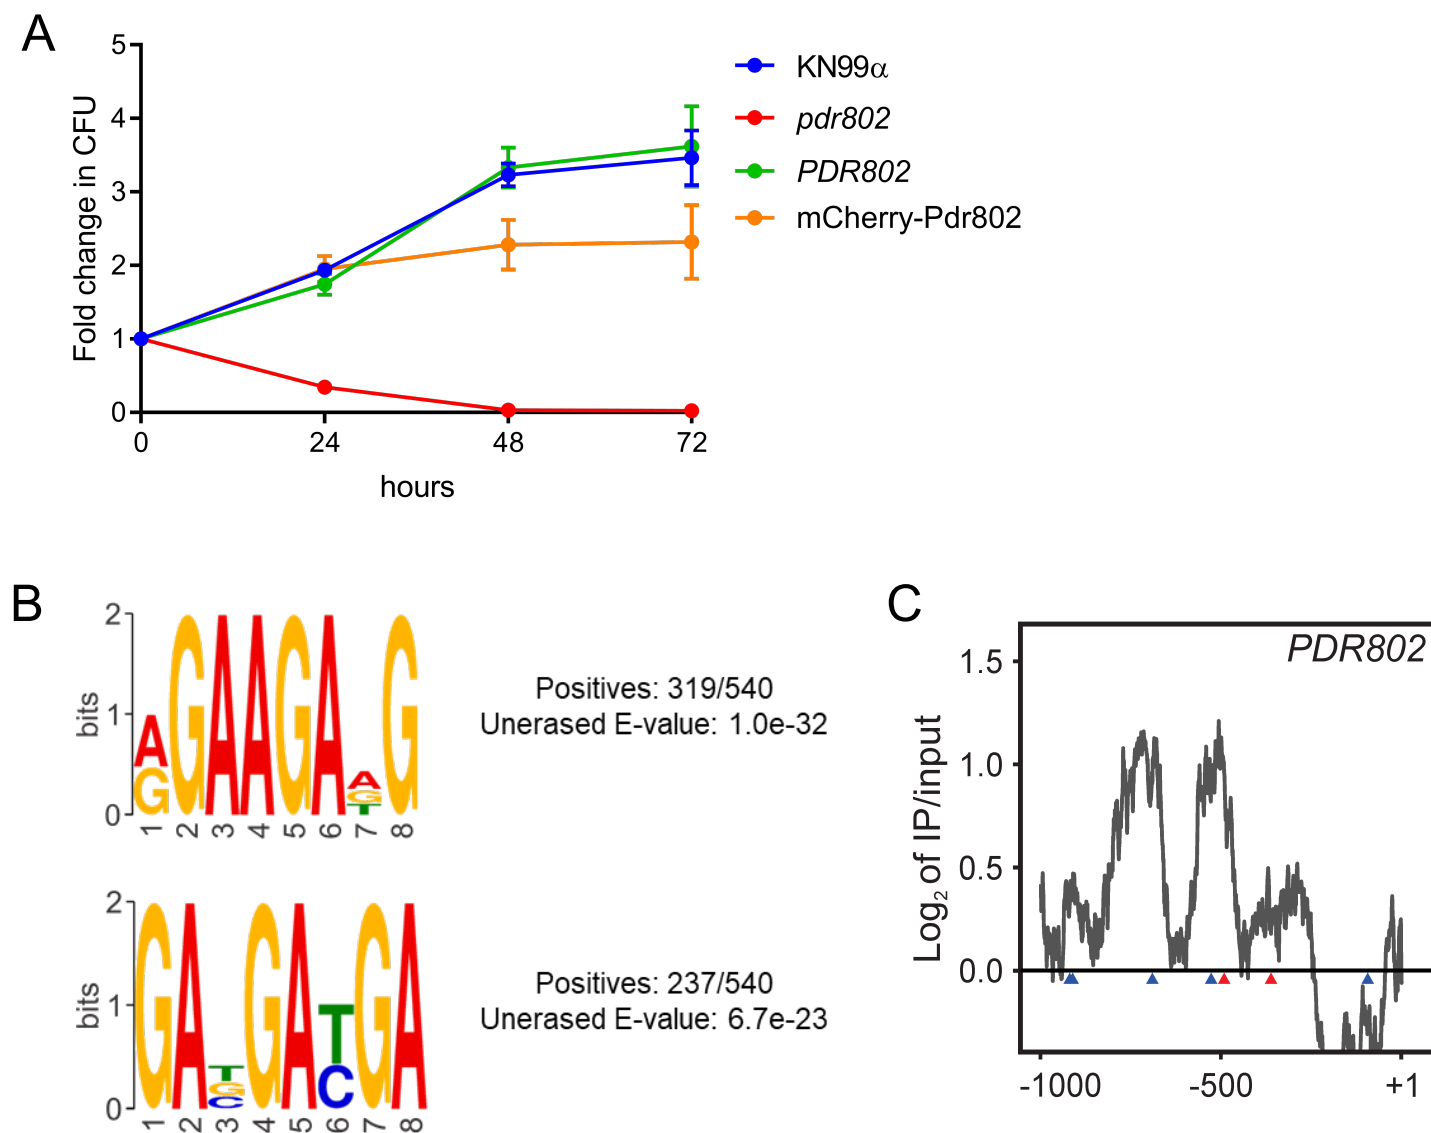

**Figure S7. Strain viability, Pdr802 interaction with its own promoter, and putative DNA-binding motifs.** A. The indicated strains were grown in DMEM at 37°C and 5% CO<sub>2</sub> for the times shown and samples were tested for their ability to form colonies on YPD medium. Plotted is the fold-change in CFU relative to the initial culture. B. Putative Pdr802-binding motifs determined using DREME (76). Primary and secondary hits are shown for analysis of 1,000 bp upstream of the initiating ATG. C. The ratios (log<sub>2</sub>) of reads from immunoprecipitated (IP) DNA to reads from input DNA were calculated for 1,000 bp upstream of the first coding nucleotide (+1) of *PDR802*; shown is the difference in these values between tagged and untagged strains. Red triangles, complete Pdr802 DNA-binding motifs (Figure S7C); blue triangles, partial motifs.
